# Supplementary material
Source: PubMed Central journal article supplement (PMC3767119)

Supplemental Figure 1

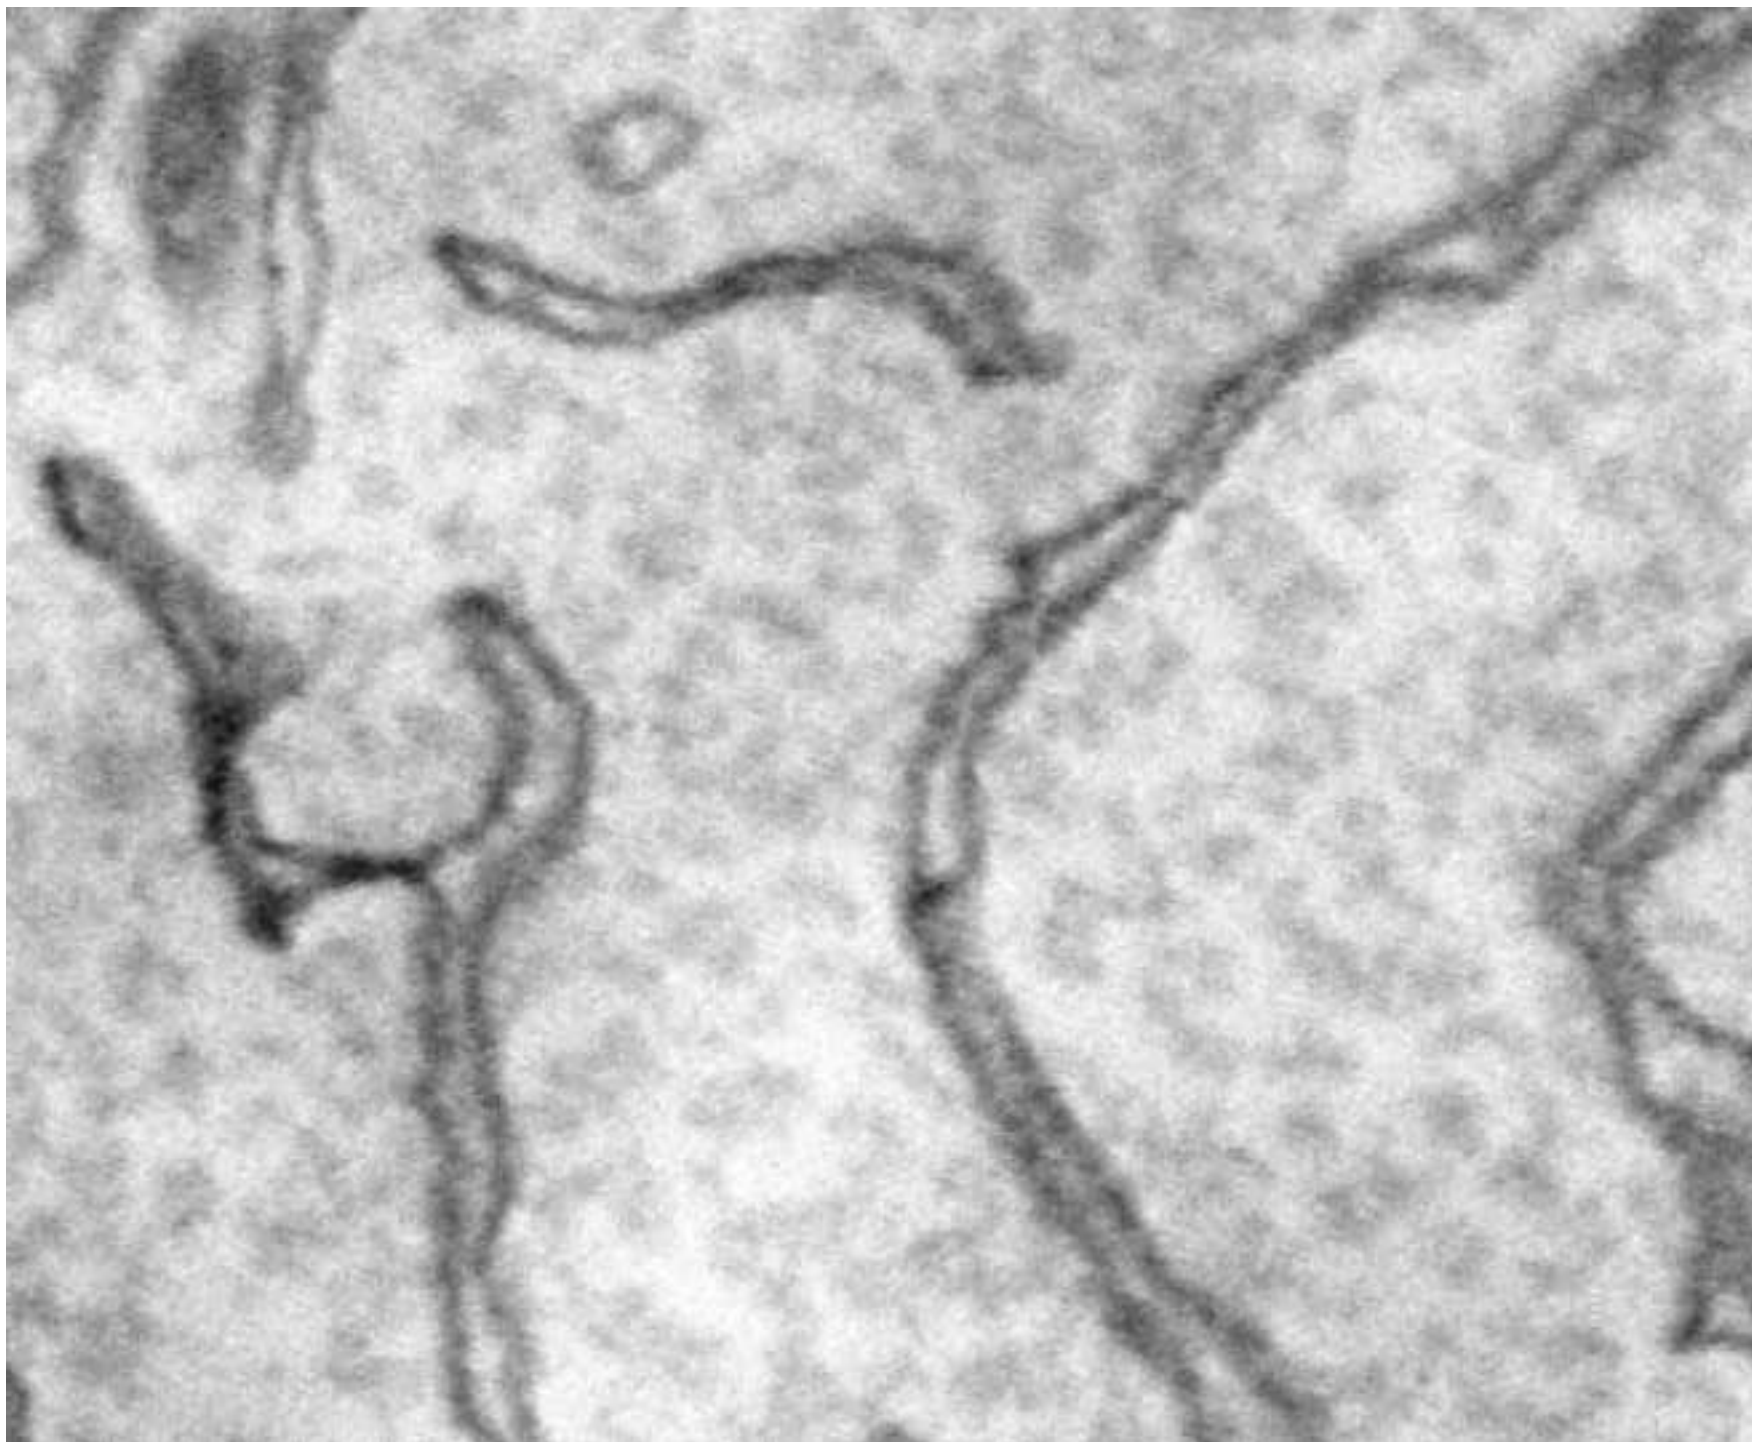

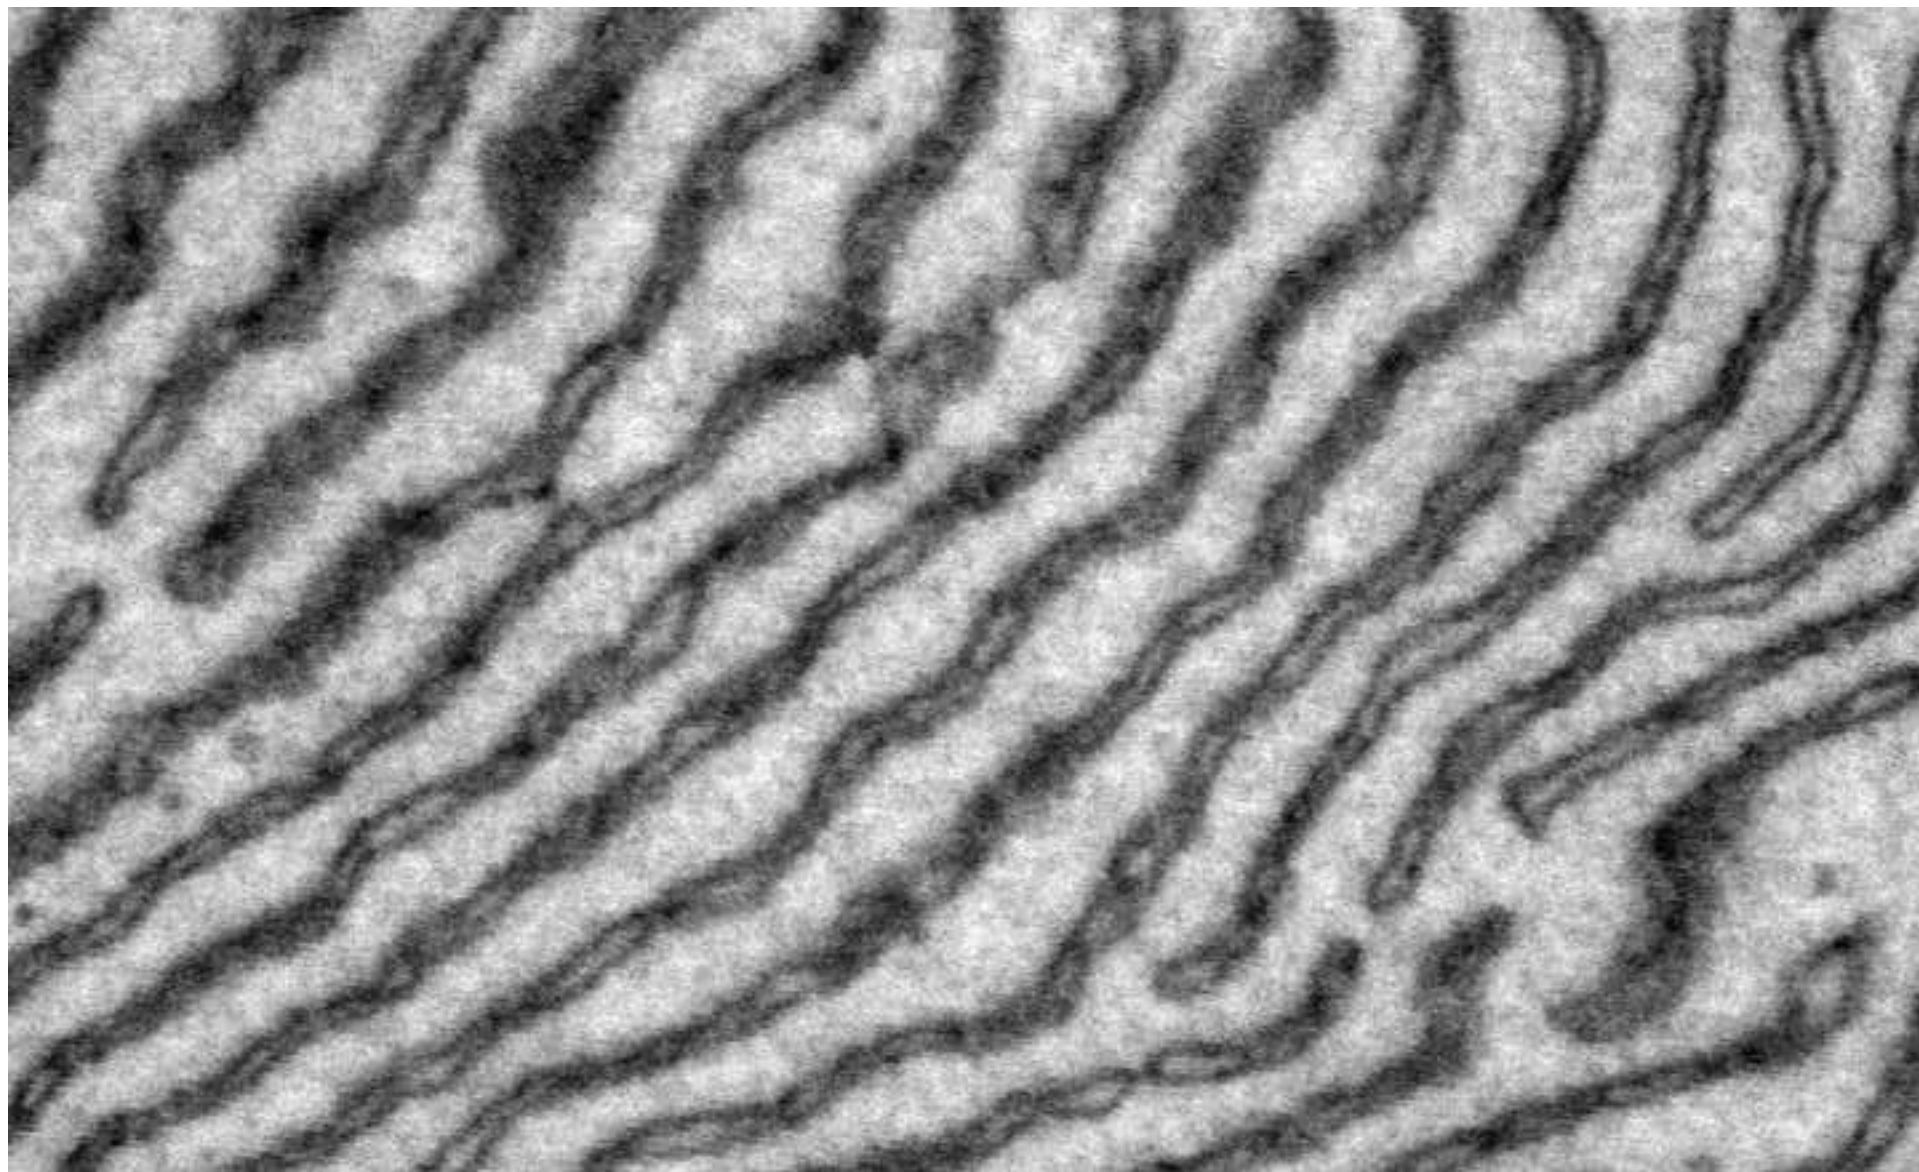

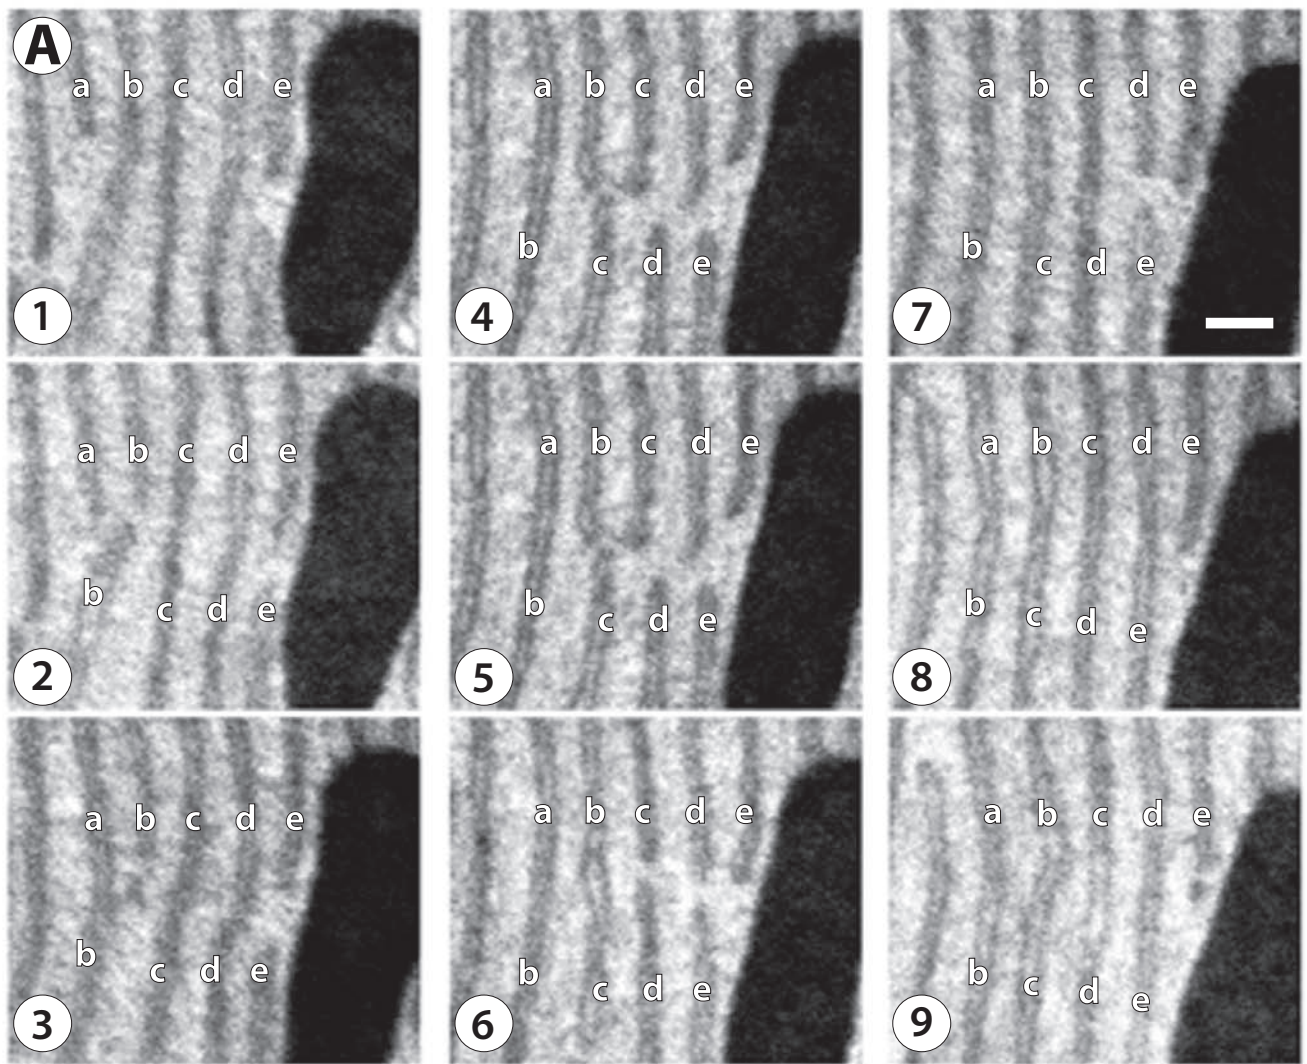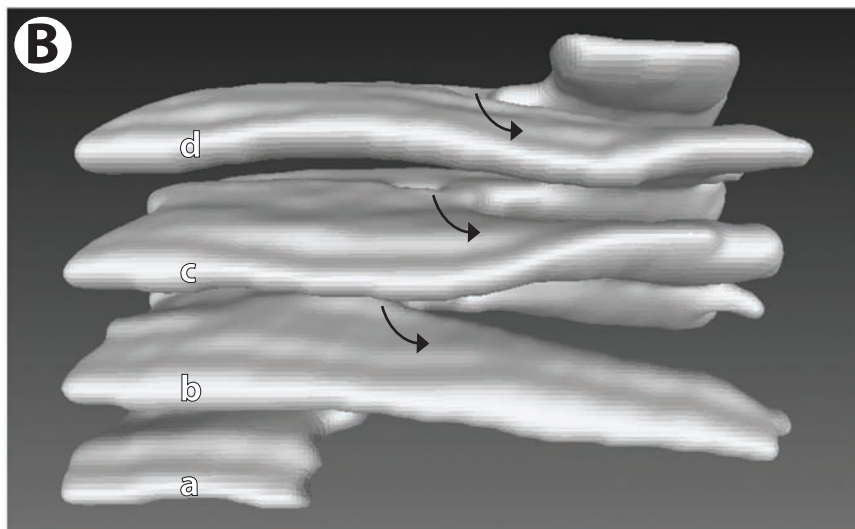

Figure S3

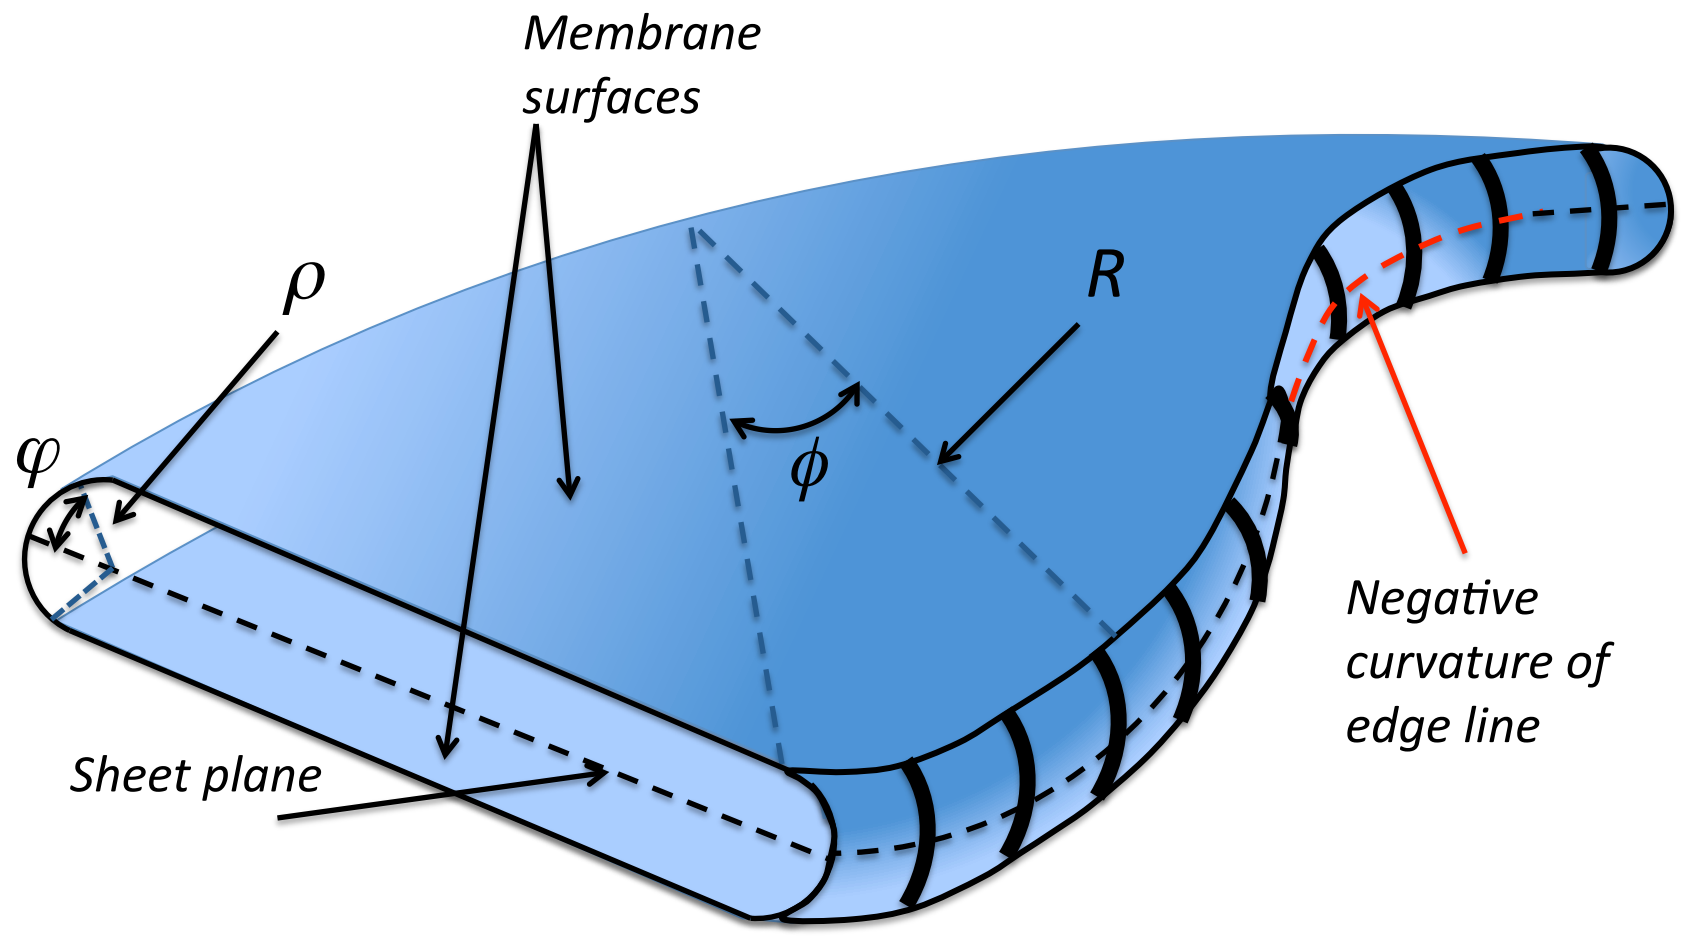

Figure S4

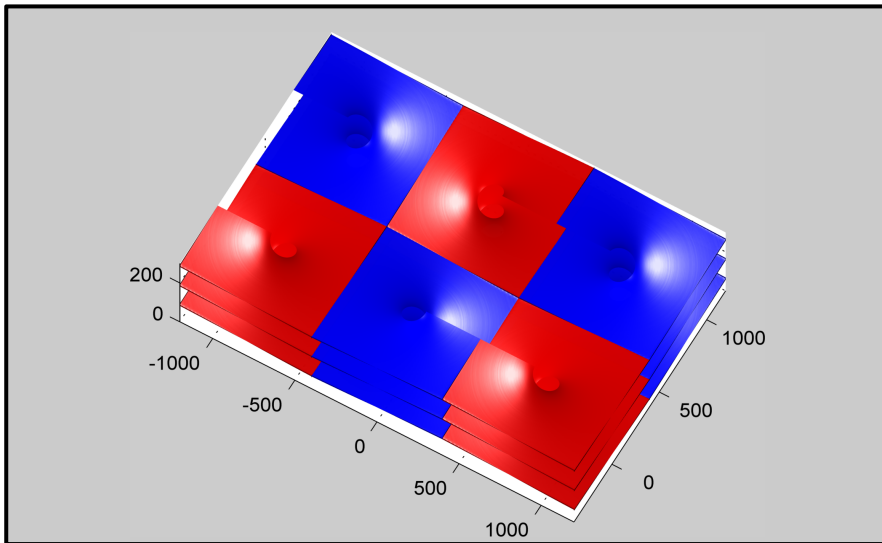

Figure S5

Supplement: NIHMS508416-supplement-08.pdf [file NIHMS508416-supplement-08.pdf]
